# Supplementary material for: Environment-Related Genes Analysis of Limosilactobacillus fermentum Isolated from Food and Human Gut: Genetic Diversity and Adaption Evolution
Source: MDPI journal article supplement (doi:10.3390/foods11193135), 2022-10-08

## Foods

### Supplementary Materials

**Table S1:** Genomic information and detailed source of 224 *L. fermentum* strains in the study.

| strain | accession   | isolation source | age | sex    | total length<br>(Mb) | GC%    | CDS  |
|--------|-------------|------------------|-----|--------|----------------------|--------|------|
| AH451  | SRR12560031 | human feces      | 6   | female | 1.92004              | 52.162 | 1901 |
| AH471  | SRR12559885 | human feces      | 86  | male   | 1.983962             | 51.9   | 1916 |
| BJ74   | SRR12559874 | human feces      | 62  | male   | 1.923224             | 52.173 | 1904 |
| BJ204  | SRR12559863 | human feces      | 61  | male   | 2.01921              | 51.927 | 1961 |
| BJ211  | SRR12559486 | human feces      | 52  | female | 1.929755             | 52.029 | 1882 |
| BJ241  | SRR12559475 | human feces      | 18  | male   | 1.972608             | 52.084 | 1905 |
| BJ314  | SRR12559463 | human feces      | 54  | male   | 2.029152             | 51.875 | 1963 |
| BJ361  | SRR12559753 | human feces      | 75  | female | 1.930506             | 52.286 | 1919 |
| BJ381  | SRR12559644 | human feces      | 50  | male   | 1.942296             | 51.58  | 1933 |
| BJ431  | SRR12559643 | human feces      | 53  | male   | 2.002277             | 51.94  | 2011 |
| BJ581  | SRR12559642 | human feces      | 55  | male   | 2.025549             | 51.78  | 2024 |
| BJ613  | SRR12559641 | human feces      | 85  | male   | 2.155527             | 51.5   | 2216 |
| BJ631  | SRR12559640 | human feces      | 81  | male   | 1.975164             | 52.09  | 1982 |
| CQ272  | SRR12559637 | human feces      | 73  | female | 1.973607             | 52.08  | 1977 |
| CQ61   | SRR12559742 | human feces      | 77  | male   | 2.011778             | 51.93  | 1964 |
| CQ71   | SRR12559731 | human feces      | 67  | male   | 2.034302             | 51.987 | 1983 |
| CQ91   | SRR12559720 | human feces      | 53  | female | 1.91                 | 52.3   | 1986 |
| CQ151  | SRR12559638 | human feces      | 48  | male   | 2.030093             | 51.89  | 2045 |
| CQ309  | SRR12559709 | human feces      | 84  | female | 1.946381             | 52.298 | 1877 |
| CQ368  | SRR12559698 | human feces      | 13  | female | 1.94974              | 52.215 | 1866 |
| FJ112  | SRR12559636 | human feces      | 1   | male   | 2.015384             | 51.72  | 2002 |
| FJ12   | SRR12559984 | human feces      | 1   | male   | 1.969459             | 52.125 | 1906 |
| FJ16   | SRR12559973 | human feces      | 1   | male   | 2.00127              | 51.972 | 1973 |

## Foods

|       |             |             |    |        |          |        |      |
|-------|-------------|-------------|----|--------|----------|--------|------|
| FJ181 | SRR12560053 | human feces | 1  | male   | 2.110157 | 51.571 | 2008 |
| FJ191 | SRR12560042 | human feces | 1  | female | 1.964027 | 52.011 | 2003 |
| GD111 | SRR12559962 | human feces | 77 | male   | 1.983958 | 52.04  | 1980 |
| GD121 | SRR12559821 | human feces | 46 | male   | 1.985253 | 52.05  | 1972 |
| GD131 | SRR12559809 | human feces | 12 | male   | 1.979319 | 52.07  | 1969 |
| GD181 | SRR12559798 | human feces | 42 | male   | 1.962846 | 52.11  | 1959 |
| GD223 | SRR12560116 | human feces | 10 | male   | 2.077208 | 51.63  | 2097 |
| GD331 | SRR12560105 | human feces | 86 | male   | 1.922951 | 52.14  | 1926 |
| GD351 | SRR12559847 | human feces | 77 | female | 2.053515 | 51.82  | 2088 |
| GD363 | SRR12559846 | human feces | 78 | female | 2.082809 | 51.57  | 2121 |
| GD611 | SRR12559845 | human feces | 74 | male   | 2.035065 | 51.83  | 2014 |
| GD661 | SRR12559844 | human feces | 9  | male   | 2.087264 | 51.56  | 2078 |
| GD673 | SRR12559843 | human feces | 64 | female | 2.036044 | 51.79  | 2022 |
| GD712 | SRR12559647 | human feces | 72 | female | 2.071553 | 51.81  | 2045 |
| GD723 | SRR12559646 | human feces | 70 | female | 1.947764 | 52.02  | 1942 |
| GD741 | SRR12560025 | human feces | 10 | male   | 1.949121 | 52.02  | 1941 |
| GD752 | SRR12560024 | human feces | 68 | male   | 1.930005 | 52.24  | 1903 |
| GD761 | SRR12559645 | human feces | 65 | female | 2.010427 | 52.17  | 1994 |
| GS504 | SRR12559949 | human feces | 13 | male   | 1.958086 | 52.216 | 1859 |
| GX51  | SRR12559938 | human feces | 83 | female | 1.953285 | 51.89  | 1960 |
| GX61  | SRR12559927 | human feces | 81 | female | 2.035179 | 51.68  | 2069 |
| HM107 | SRR12559842 | human feces | 87 | female | 2.035179 | 51.68  | 2069 |
| HM301 | SRR12559494 | human feces | 71 | female | 1.98874  | 51.924 | 1939 |
| HM311 | SRR12559585 | human feces | 65 | female | 1.925204 | 52.098 | 1891 |
| HM321 | SRR12559574 | human feces | 86 | female | 1.97109  | 52.056 | 1916 |
| HM661 | SRR12559517 | human feces | 50 | female | 1.931465 | 52.282 | 1863 |
| HN112 | SRR12559658 | human feces | 92 | male   | 2.144258 | 51.33  | 2175 |

## Foods

|        |             |             |    |        |          |        |      |
|--------|-------------|-------------|----|--------|----------|--------|------|
| HN114  | SRR12559657 | human feces | 92 | male   | 2.14437  | 51.32  | 2173 |
| HN115  | SRR12559656 | human feces | 92 | male   | 2.142472 | 51.34  | 2168 |
| HN116  | SRR12559655 | human feces | 92 | male   | 2.144719 | 51.32  | 2173 |
| HN117  | SRR12559654 | human feces | 92 | male   | 2.133678 | 51.38  | 2165 |
| HN118  | SRR12559653 | human feces | 92 | male   | 2.020379 | 51.96  | 2034 |
| HN119  | SRR12559652 | human feces | 92 | male   | 2.119819 | 51.44  | 2130 |
| HN1110 | SRR12559651 | human feces | 92 | male   | 2.131763 | 51.39  | 2163 |
| HN286  | SRR12559837 | human feces | 48 | male   | 2.01399  | 52.031 | 1914 |
| HN441  | SRR12559649 | human feces | 1  | female | 1.977274 | 52.16  | 2002 |
| HN191  | SRR12559841 | human feces | 77 | female | 2.020119 | 51.77  | 2032 |
| HN239  | SRR12559840 | human feces | 72 | female | 1.925493 | 52.27  | 1918 |
| HN261  | SRR12559839 | human feces | 66 | female | 1.981315 | 51.99  | 1979 |
| HN401  | SRR12559836 | human feces | 3  | female | 1.975071 | 51.93  | 1965 |
| JX111  | SRR12559544 | human feces | 61 | female | 2.049902 | 51.863 | 2014 |
| JX121  | SRR12559543 | human feces | 72 | male   | 1.973114 | 52.182 | 1878 |
| JX192  | SRR12559542 | human feces | 71 | female | 2.049329 | 52.025 | 1933 |
| JX201  | SRR12559541 | human feces | 73 | female | 2.021685 | 51.915 | 1959 |
| JX61   | SRR12559545 | human feces | 12 | female | 1.963315 | 52.155 | 1906 |
| NM232  | SRR12559540 | human feces | 51 | female | 1.973519 | 52.107 | 1887 |
| NM241  | SRR12559538 | human feces | 51 | male   | 1.867068 | 52.487 | 1828 |
| NM271  | SRR12559537 | human feces | 41 | female | 2.104537 | 51.587 | 1922 |
| NT21   | SRR12559832 | human feces | 90 | female | 2.012898 | 52.004 | 1885 |
| NT272  | SRR12559831 | human feces | 78 | female | 1.992488 | 52.261 | 1891 |
| NT31   | SRR12559830 | human feces | 72 | male   | 2.030522 | 51.77  | 2041 |
| NT41   | SRR12559829 | human feces | 73 | female | 1.929138 | 51.7   | 1919 |
| NT652  | SRR12559826 | human feces | 85 | male   | 2.149885 | 51.616 | 1964 |
| NT153  | SRR12559835 | human feces | 95 | female | 1.958412 | 52.03  | 1955 |

## Foods

|        |             |             |    |        |          |        |      |
|--------|-------------|-------------|----|--------|----------|--------|------|
| NT165  | SRR12559834 | human feces | 82 | female | 2.023924 | 51.71  | 2046 |
| NT171  | SRR12559833 | human feces | /  | /      | 1.982732 | 51.97  | 1991 |
| NT575  | SRR12559828 | human feces | 74 | male   | 2.123841 | 51.37  | 2166 |
| NT753  | SRR12559563 | human feces | 91 | female | 2.107499 | 51.62  | 2103 |
| NX642  | SRR12559634 | human feces | 58 | male   | 2.050731 | 51.76  | 2096 |
| NX657  | SRR12559633 | human feces | 65 | female | 2.257901 | 51.14  | 2315 |
| NX681  | SRR12559632 | human feces | 17 | male   | 2.02146  | 51.92  | 2046 |
| QH161  | SRR12559536 | human feces | 10 | female | 1.933043 | 52.17  | 1901 |
| QH181  | SRR12559535 | human feces | 46 | male   | 1.936134 | 52.135 | 1866 |
| QH221  | SRR12559534 | human feces | 38 | female | 1.959191 | 52.156 | 1872 |
| QH495  | SRR12559533 | human feces | 33 | male   | 1.947097 | 52.214 | 1861 |
| QH804  | SRR12559532 | human feces | /  | male   | 2.108428 | 51.493 | 1923 |
| QH837  | SRR12559531 | human feces | 37 | male   | 2.159499 | 51.436 | 2022 |
| SC381  | SRR12559530 | human feces | /  | male   | 1.957259 | 52.314 | 2059 |
| SH101  | SRR12559990 | human feces | 82 | female | 2.064394 | 51.931 | 2005 |
| SD131  | SRR12559631 | human feces | 1  | female | 2.045336 | 51.73  | 2066 |
| SH171  | SRR12559693 | human feces | 86 | female | 2.056894 | 51.845 | 1951 |
| SH251  | SRR12559857 | human feces | 86 | female | 1.930566 | 52.22  | 1922 |
| SH272  | SRR12559856 | human feces | 85 | female | 1.987704 | 51.94  | 1964 |
| SH281  | SRR12559855 | human feces | 85 | female | 1.96091  | 52.04  | 1947 |
| SH371  | SRR12559854 | human feces | 83 | female | 2.023529 | 51.8   | 2020 |
| SH43   | SRR12560125 | human feces | 86 | female | 1.947462 | 52.342 | 1866 |
| SH54   | SRR12560124 | human feces | 85 | female | 2.026251 | 51.816 | 1954 |
| SH65   | SRR12560123 | human feces | 87 | male   | 2.035882 | 51.787 | 1951 |
| SH95   | SRR12560122 | human feces | 90 | male   | 2.087559 | 51.657 | 1996 |
| SL1321 | SRR12559630 | human feces | 72 | female | 1.885286 | 52.07  | 1865 |
| SL185  | SRR12559629 | human feces | 52 | female | 2.127545 | 51.32  | 2146 |

## Foods

|        |             |             |     |        |          |        |      |
|--------|-------------|-------------|-----|--------|----------|--------|------|
| SL211  | SRR12559526 | human feces | 78  | male   | 1.975867 | 52.107 | 1910 |
| SL2213 | SRR12559525 | human feces | 55  | male   | 1.953168 | 52.214 | 1868 |
| SL241  | SRR12559524 | human feces | 75  | female | 1.980236 | 51.933 | 1874 |
| SL271  | SRR12559789 | human feces | 68  | female | 1.892259 | 52.436 | 1828 |
| SL292  | SRR12560126 | human feces | 76  | female | 1.996618 | 52.056 | 1920 |
| SL312  | SRR12559627 | human feces | 68  | female | 2.059861 | 51.71  | 2090 |
| SL521  | SRR12559626 | human feces | 60  | male   | 1.883842 | 52.34  | 1852 |
| SP241  | SRR12559529 | human feces | 100 | female | 1.890399 | 52.275 | 1863 |
| SP331  | SRR12559527 | human feces | 54  | male   | 1.940669 | 52.329 | 1839 |
| WX111  | SRR12559691 | human feces | 78  | female | 2.022235 | 51.88  | 2026 |
| WX112  | SRR12559690 | human feces | 78  | female | 2.021786 | 51.88  | 2017 |
| WX113  | SRR12559689 | human feces | 78  | female | 2.020754 | 51.87  | 2007 |
| WX114  | SRR12559688 | human feces | 78  | female | 2.020046 | 51.87  | 2018 |
| WX115  | SRR12559687 | human feces | 78  | female | 2.01993  | 51.87  | 1999 |
| WX11   | SRR12559785 | human feces | 80  | /      | 1.925893 | 52.267 | 1874 |
| WX121  | SRR12559553 | human feces | 84  | female | 1.971969 | 51.987 | 1903 |
| WX141  | SRR12559552 | human feces | 78  | male   | 1.961175 | 52.208 | 1854 |
| WX161  | SRR12559551 | human feces | 89  | male   | 2.132632 | 51.61  | 2037 |
| WX183  | SRR12559549 | human feces | 81  | male   | 1.985916 | 52.096 | 1896 |
| WX213  | SRR12559548 | human feces | 90  | female | 1.922467 | 52.288 | 1828 |
| WX252  | SRR12559547 | human feces | 84  | female | 2.020009 | 51.891 | 1951 |
| WX61   | SRR12559774 | human feces | 81  | female | 1.9747   | 52.131 | 1877 |
| WX91   | SRR12559763 | human feces | 85  | female | 2.005265 | 51.936 | 1941 |
| XC263  | SRR12559684 | human feces | 56  | female | 1.964818 | 52.232 | 1900 |
| XC32   | SRR12559686 | human feces | 2   | female | 2.086295 | 51.69  | 2100 |
| XC416  | SRR12559682 | human feces | 26  | female | 1.942235 | 52.261 | 1837 |
| XC61   | SRR12559685 | human feces | 5   | male   | 2.116212 | 51.45  | 2131 |

## Foods

|        |             |             |    |        |          |        |      |
|--------|-------------|-------------|----|--------|----------|--------|------|
| XS212  | SRR12559681 | human feces | 53 | female | 1.937229 | 52.322 | 1898 |
| XS71   | SRR12559680 | human feces | 11 | male   | 2.02987  | 51.59  | 2061 |
| XW241  | SRR12559679 | human feces | 45 | female | 2.148222 | 51.724 | 2012 |
| XW331  | SRR12559678 | human feces | 36 | female | 1.959917 | 52.17  | 2010 |
| XW341  | SRR12559677 | human feces | 57 | female | 1.965164 | 52.17  | 2022 |
| XW391  | SRR12559676 | human feces | 7  | female | 2.010074 | 51.63  | 1998 |
| XW411  | SRR12559675 | human feces | 8  | male   | 2.007773 | 51.92  | 1989 |
| XW463  | SRR12559674 | human feces | 48 | female | 2.026653 | 51.908 | 2035 |
| YC74   | SRR12559546 | human feces | /  | female | 1.998299 | 52.046 | 2013 |
| YN361  | SRR12560023 | human feces | /  | female | 2.119972 | 51.23  | 2131 |
| YN497  | SRR12560022 | human feces | /  | /      | 2.036369 | 51.5   | 2091 |
| YN54   | SRR12559673 | human feces | /  | /      | 1.958265 | 52.304 | 1892 |
| YN64   | SRR12559671 | human feces | 49 | female | 2.103536 | 51.582 | 2014 |
| YN96   | SRR12559670 | human feces | 57 | male   | 1.930423 | 52.241 | 1825 |
| YN611  | SRR12559669 | human feces | 11 | female | 2.107499 | 51.62  | 2103 |
| YZ156  | SRR12560021 | human feces | 60 | male   | 1.863906 | 52.3   | 1872 |
| YZ1610 | SRR12560020 | human feces | 59 | male   | 1.969128 | 52.2   | 1995 |
| YZ96   | SRR12559635 | human feces | 63 | male   | 1.970882 | 51.9   | 1947 |
| ZH1010 | SRR12559853 | human feces | /  | /      | 1.986303 | 51.7   | 1953 |
| ZH241  | SRR12559852 | human feces | /  | male   | 1.968883 | 51.99  | 1970 |
| ZJ122  | SRR12560019 | human feces | 7  | female | 2.187189 | 51.24  | 2238 |
| ZT25   | SRR12559668 | human feces | 65 | female | 1.95084  | 52.193 | 1868 |
| ZT139  | SRR12559667 | human feces | 76 | female | 1.938162 | 52.085 | 1877 |
| ZT205  | SRR12559666 | human feces | 83 | male   | 1.930131 | 52.461 | 1861 |
| ZT226  | SRR12559665 | human feces | /  | female | 1.929055 | 52.413 | 1938 |
| ZT238  | SRR12559664 | human feces | /  | male   | 1.948108 | 52.333 | 1957 |
| ZT243  | SRR12559663 | human feces | 62 | female | 2.016053 | 51.965 | 1990 |

## Foods

|           |             |                 |    |        |          |        |       |
|-----------|-------------|-----------------|----|--------|----------|--------|-------|
| ZT251     | SRR12559662 | human feces     | 80 | male   | 2.013958 | 51.904 | 1936  |
| ZT591     | SRR12559851 | human feces     | /  | male   | 2.084569 | 51.67  | 2078  |
| ZT607     | SRR12559850 | human feces     | 78 | female | 2.082168 | 51.57  | 2101  |
| ZT618     | SRR12559848 | human feces     | 75 | male   | 1.989632 | 51.97  | 1992  |
| ZT671     | SRR12559660 | human feces     | 83 | male   | 2.010001 | 51.919 | 1945  |
| ZT681     | SRR12559659 | human feces     | /  | male   | 2.020224 | 51.869 | 1968  |
| LMT2_75   | online      | kimchi          |    |        | 2.33     | 50.48  | 2,108 |
| 2760      | online      | dairy           |    |        | 2.27     | 51.4   | 2,004 |
| FTDC_8312 | online      | fecal sample    |    |        | 2.24     | 51     | 2,029 |
| USM_8633  | online      | fermented meat  |    |        | 2.24     | 51     | 2,028 |
|           |             | sausage         |    |        |          |        |       |
| SRCM10328 | online      | food            |    |        | 2.15     | 51.3   | 1,979 |
| 5         |             |                 |    |        |          |        |       |
| SRCM10329 | online      | food            |    |        | 2.12     | 51.4   | 1,863 |
| 0         |             |                 |    |        |          |        |       |
| HFD1      | online      | Homo sapiens    |    |        | 2.1      | 51.8   | 1,927 |
|           |             | fecal sample    |    |        |          |        |       |
| IMDO13010 | online      | sourdough       |    |        | 2.09     | 51.5   | 1,835 |
| 1         |             |                 |    |        |          |        |       |
| LDTM7301  | online      | Makgeolli       |    |        | 2.05     | 51.7   | 1,837 |
| CBA7106   | online      | adult feces     |    |        | 2.04     | 51.7   | 1,859 |
| MTCC25067 | online      | fermented milk  |    |        | 2.01     | 51.18  | 1,684 |
| NCC2970   | online      | /               |    |        | 1.95     | 52.2   | 1,758 |
| YL_11     | online      | fermented milk  |    |        | 1.91     | 51.9   | 1,656 |
| B128      | online      | fermented beets |    |        | 1.91     | 52.3   | 1,736 |
| MTCC5898  | online      | Homo sapiens    |    |        | 2.1      | 52.1   | 1,583 |
|           |             | Infant fecal    |    |        |          |        |       |

## Foods

|           |        |                   |      |      |       |
|-----------|--------|-------------------|------|------|-------|
|           |        | sample            |      |      |       |
| VRI_003   | online | Commercial        | 1.95 | 52   |       |
|           |        | probiotic culture |      |      | 1817  |
|           |        | lyophilized       |      |      |       |
| 47_7      | online | Homo sapiens      | 2.1  | 52.2 |       |
|           |        | fecal sample      |      |      | 1,644 |
| LFQI6     | online | Homo sapiens      | 2.1  | 52.1 |       |
|           |        | fecal sample      |      |      | 1,623 |
| 39        | online | human feces       | 1.83 | 51.6 | 1,704 |
| CRL1446   | online | Goat milk         | 2.15 | 51.4 |       |
|           |        | cheese            |      |      | 1,976 |
| D12       | online | Fresh smoked      | 2.02 | 52   |       |
|           |        | cheese            |      |      | 1,868 |
| 222       | online | Cocoa bean        | 1.95 | 52.1 |       |
|           |        | fermentation      |      |      | 1,768 |
| AF15_40LB | online | human feces       | 1.97 | 52   | 1,813 |
| MGYG_HGU  | online | human gut         | 1.97 | 52   |       |
| T_00166   |        |                   |      |      | 1,814 |
| FUA3588   | online | Mahewu            | 2.02 | 51.7 | 1,840 |
| S6        | online | Sour wort,        | 1.91 | 52.3 |       |
|           |        | Tchapalo          |      |      |       |
|           |        | (Sorghum          |      |      | 1,718 |
|           |        | african beer)     |      |      |       |
|           |        | processing        |      |      |       |
| S13       | online | Sour wort,        | 1.92 | 52.3 |       |
|           |        | Tchapalo          |      |      | 1,718 |
|           |        | (Sorghum          |      |      |       |



## Foods

|           |        |                |      |      |       |
|-----------|--------|----------------|------|------|-------|
|           |        | african beer)  |      |      |       |
|           |        | processing     |      |      |       |
| AF11_4_H  | online | human fece     | 1.94 | 52.2 | 1,380 |
| 103       | online | Homo sapiens   | 2.05 | 51.8 | 1,900 |
|           |        | cecum          |      |      |       |
| L13       | online | human fece     | 1.95 | 52.6 | 1,821 |
| 279       | online | Homo sapiens   | 1.98 | 52   | 1,828 |
|           |        | fece           |      |      |       |
| DS19_7    | online | dietary        | 2.02 | 51.6 |       |
|           |        | supplement     |      |      | 1,807 |
|           |        | products       |      |      |       |
| 311       | online | Homo sapiens   | 2.04 | 51.8 | 1,860 |
|           |        | feces          |      |      |       |
| 317       | online | fermented milk | 1.92 | 51.5 | 1,674 |
| CECT9269  | online | tocosh,        | 2.08 | 51.7 |       |
|           |        | Peruvian       |      |      |       |
|           |        | traditional    |      |      | 1,907 |
|           |        | fermented      |      |      |       |
|           |        | potatoes       |      |      |       |
| S30       | online | human feces    | 2.16 | 51.2 | 2,008 |
| L18       | online | human feces    | 2.11 | 52   | 1,966 |
| UCO_979C  | online | Homo sapiens   | 2.01 | 51.9 | 1,517 |
|           |        | feces          |      |      |       |
| DS13_7    | online | dietary        | 2    | 51.8 |       |
|           |        | supplement     |      |      | 1,770 |
|           |        | products       |      |      |       |
| AF16_22LB | online | human feces    | 2    | 51.9 | 1,827 |

## Foods

|           |        |                               |      |       |       |
|-----------|--------|-------------------------------|------|-------|-------|
| LFU21     | online | Homo sapiens                  | 1.97 | 51.7  |       |
|           |        | feces of an astronaut         |      |       | 1,796 |
| NBRC3959  | online | /                             | 1.93 | 52.1  | 1,831 |
| BFE6620   | online | Gari                          | 1.98 | 52.1  | 1,806 |
| KMB_612   | online | bryndza cheese                | 1.92 | 52.2  | 1,764 |
| FAM19471  | online | cheese                        | 2.04 | 51.5  | 1,921 |
| RI_508    | online | cacao been fermentation       | 1.92 | 52.2  | 1,767 |
| KMB_613   | online | bryndza cheese                | 2.01 | 52.1  | 1,875 |
| FUA3589   | online | Mahewu                        | 2.08 | 51.5  | 1,843 |
| LF2       | online | dairy (cheese)                | 2.05 | 51.7  | 1,875 |
| NCDC400   | online | curd                          | 1.9  | 51.6  | 1,660 |
| DR9       | online | Cow Fresh milk                | 2.36 | 50.44 | 1,678 |
| HFB3      | online | Homo sapiens fecal sample     | 2.04 | 51.8  | 1,366 |
| CIMMAG14  | online | human digestive tract         | 1.76 | 49.7  | 1,750 |
| 15        |        |                               |      |       |       |
| 3872      | online | Homo sapiens milk from female | 2.33 | 50.56 | 2111  |
| ATCC14931 | online | fermented beets               | 1.87 | 52.6  | 1,676 |
| CECT5716  | online | Human milk                    | 2.1  | 51.5  | 1631  |
| F_6       | online | /                             | 2.06 | 51.7  | 1,848 |
| IFO3956   | online | Fermented plant material      | 2.1  | 51.5  | 1916  |
| LF1       | online | Homo sapiens                  | 1.82 | 52.5  | 1,677 |

## Foods

---

|          |        |                |      |       |       |
|----------|--------|----------------|------|-------|-------|
|          |        | male human gut |      |       |       |
|          |        | feces          |      |       |       |
| MTCC8711 | online | yogurt         | 2.57 | 49.65 | 2,264 |

---

## Foods

**Table S2:** LDA (linear discriminant analysis) score of dominant COG categories in the genome of *L. fermentum* strains derived from human gut and food.

| Food source | COG category | LDA score   | Human gut source | COG category | LDA score |
|-------------|--------------|-------------|------------------|--------------|-----------|
| COG2826     | X            | 3.672093952 | COG1309          | K            | 2.856816  |
| COG3328     | X            | 3.670942152 | COG1028          | I            | 2.770695  |
| COG2801     | X            | 3.547536632 | COG0583          | C            | 2.712504  |
| COG0675     | X            | 3.466125672 | COG0531          | E            | 2.685298  |
| COG1943     | X            | 3.376002135 | COG0716          | C            | 2.618832  |
| COG2963     | X            | 3.258079384 | COG1063          | E R          | 2.513247  |
| COG3464     | X            | 3.129916415 | COG2151          | O            | 2.492278  |
| COG3436     | X            | 2.664887429 | COG0076          | E            | 2.465703  |
| COG3293     | X            | 2.491585793 | COG1136          | M            | 2.450191  |
| COG2217     | P            | 2.45177289  | COG3104          | E            | 2.441617  |
| COG1518     | V            | 2.430339874 | COG1062          | C            | 2.40334   |
| COG0789     | K            | 2.421040582 | COG0697          | G E R        | 2.401072  |
| COG0463     | M            | 2.38417996  | COG1073          | T            | 2.399626  |
| COG2814     | G            | 2.292681744 | COG0366          | G            | 2.38801   |
| COG0657     | I            | 2.261533651 | COG0745          | K T          | 2.354477  |
| COG2055     | C            | 2.258852922 | COG0577          | V            | 2.345387  |
| COG3051     | C            | 2.255829674 | COG0075          | E F          | 2.333589  |
| COG1767     | H            | 2.249459398 | COG0642          | T            | 2.29508   |
| COG3512     | S            | 2.248213512 | COG0436          | E            | 2.277372  |
| COG1397     | O            | 2.183101012 | COG1387          | E R          | 2.267052  |
| COG3513     | V            | 2.159519355 | COG0141          | E            | 2.251421  |
| COG5542     | G            | 2.149190239 | COG0118          | E            | 2.246166  |
| COG4152     | R            | 2.128542946 | COG0106          | E            | 2.24565   |
| COG0446     | I            | 2.11520244  | COG0390          | P            | 2.244486  |
| COG3378     | X            | 2.076088223 | COG1484          | L            | 2.241856  |
| COG1457     | F            | 2.044253358 | COG0040          | E            | 2.239593  |
| COG2190     | G            | 2.033332489 | COG3705          | E            | 2.2371    |
| COG2132     | D M P        | 2.017478116 | COG1760          | E            | 2.233829  |
| COG0074     | C            | 2.016924426 | COG0494          | V            | 2.22388   |
| COG5039     | M G          | 2.013502484 | COG0131          | E            | 2.222522  |
| COG0003     | P            | 2.01101159  | COG0473          | C E          | 2.219941  |
| human feces |              |             | COG3971          | Q            | 2.213778  |
|             |              |             | COG0549          | E            | 2.212223  |
|             |              |             | COG2188          | K            | 2.209438  |
|             |              |             | COG0385          | R            | 2.204749  |

## Foods

|  |  |  |         |     |          |
|--|--|--|---------|-----|----------|
|  |  |  | COG1139 | C   | 2.203255 |
|  |  |  | COG0069 | E   | 2.195191 |
|  |  |  | COG0798 | P   | 2.191073 |
|  |  |  | COG3093 | V   | 2.181763 |
|  |  |  | COG0065 | E   | 2.181393 |
|  |  |  | COG0129 | G E | 2.174447 |
|  |  |  | COG0066 | E   | 2.170776 |
|  |  |  | COG0154 | J   | 2.166691 |
|  |  |  | COG4908 | R   | 2.165513 |
|  |  |  | COG0059 | E H | 2.158818 |
|  |  |  | COG0039 | C   | 2.158164 |
|  |  |  | COG1940 | K G | 2.149748 |
|  |  |  | COG1171 | E   | 2.147106 |
|  |  |  | COG1959 | K   | 2.136676 |
|  |  |  | COG1119 | P   | 2.134307 |
|  |  |  | COG2350 | Q R | 2.132306 |
|  |  |  | COG0493 | E R | 2.131612 |
|  |  |  | COG1668 | C P | 2.127838 |
|  |  |  | COG3048 | E   | 2.115627 |
|  |  |  | COG1808 | S   | 2.086555 |
|  |  |  | COG1783 | X   | 2.080448 |
|  |  |  | COG0394 | T   | 2.079559 |
|  |  |  | COG0679 | R   | 2.077975 |
|  |  |  | COG0340 | H   | 2.074603 |
|  |  |  | COG0505 | E F | 2.073012 |
|  |  |  | COG0457 | R   | 2.072303 |
|  |  |  | COG4690 | E   | 2.07029  |
|  |  |  | COG1556 | C   | 2.069592 |
|  |  |  | COG1263 | G   | 2.058164 |
|  |  |  | COG1893 | H   | 2.05467  |
|  |  |  | COG0507 | L   | 2.053786 |
|  |  |  | COG0235 | G E | 2.042423 |
|  |  |  | COG0389 | L   | 2.026598 |
|  |  |  | COG0846 | O   | 2.023163 |
|  |  |  | COG1038 | C   | 2.016359 |
|  |  |  | COG0550 | L   | 2.016075 |
|  |  |  | COG0247 | C   | 2.012152 |
|  |  |  | COG0790 | R   | 2.00463  |
|  |  |  | COG2723 | G   | 2.00168  |

## Foods

**Table S3:** Distribution of CRISPR-Cas systems in the genome of *L. fermentum* strains (Of 224 *L. fermentum* strains, 210 strains contain at least one CRISPR and 159 strains containing cas genes are listed below).

| strains         | CAS Type     | strains   | CAS Type     | strains   | CAS Type     |
|-----------------|--------------|-----------|--------------|-----------|--------------|
| 103             | CAS-TypeIE   | AF11_4_H  | CAS-TypeIE   | LMT2_75   | CAS-TypeIIA  |
| BJ431           | CAS-TypeIIC  | ZT671     | CAS-TypeIE   | SL185     | CAS-TypeIIA  |
| HN261           | CAS-TypeIIA  | JX111     | CAS-TypeIE   | SL185     | CAS-TypeIE   |
| ZT618           | CAS-TypeIIA  | JX192     | CAS-TypeIE   | QH495     | CAS-TypeIE   |
| ZT618           | CAS-TypeIIC  | YZ1610    | CAS-TypeIE   | NM241     | CAS-TypeIIA  |
| BJ74            | CAS-TypeIIA  | GD223     | CAS-TypeIE   | NM232     | CAS-TypeIIA  |
| CBA7106         | CAS-TypeIE   | QH837     | CAS-TypeIE   | NM232     | CAS-TypeIE   |
| SRCM103285      | CAS-TypeIIA  | XC32      | CAS-TypeIE   | NM232     | CAS-TypeIIC  |
| LDTM7301        | CAS-TypeIIA  | GD661     | CAS-TypeIE   | XS71      | CAS-TypeIIA  |
| LDTM7301        | CAS-TypeIE   | GD661     | CAS-TypeIIA  | XS71      | CAS-TypeIE   |
| SL211           | CAS-TypeIE   | GD661     | CAS-TypeIIC  | XS71      | CAS-TypeIIC  |
| YN611           | CAS-TypeIIA  | GD673     | CAS-TypeIE   | XS71      | CAS-TypeIE   |
| QH181           | CAS-TypeIE   | GD673     | CAS-TypeIIA  | ZH1010    | CAS-TypeIIC  |
| QH181           | CAS-TypeIC   | GD673     | CAS-TypeIIC  | ZH1010    | CAS-TypeIE   |
| AF15_40LB       | CAS-TypeIIIA | SH281     | CAS-TypeIC   | ZH1010    | CAS-TypeIIIA |
| AF15_40LB       | CAS-TypeIIA  | JX201     | CAS-TypeIE   | ZH1010    | CAS-TypeIIA  |
| MGYG_HGUT_00166 | CAS-TypeIIA  | JX201     | CAS-TypeIIC  | 317       | CAS-TypeIIIA |
| MGYG_HGUT_00166 | CAS-TypeIIIA | JX201     | CAS-TypeIIA  | NCDC400   | CAS-TypeIIA  |
| HM661           | CAS-TypeIIA  | YN64      | CAS-TypeIE   | NCDC400   | CAS-TypeIE   |
| HM661           | CAS-TypeIE   | ZT205     | CAS-TypeIE   | MTCC25067 | CAS-TypeIC   |
| AH451           | CAS-TypeIE   | SH54      | CAS-TypeIE   | MTCC8711  | CAS-TypeIE   |
| NT165           | CAS-TypeIIA  | WX91      | CAS-TypeIE   | MTCC8711  | CAS-TypeIC   |
| NT165           | CAS-TypeIE   | GD712     | CAS-TypeIIA  | MTCC8711  | CAS-TypeIE   |
| YN497           | CAS-TypeIE   | CQ91      | CAS-TypeIE   | YL_11     | CAS-TypeIIA  |
| SH251           | CAS-TypeIIIA | CQ91      | CAS-TypeIIC  | YL_11     | CAS-TypeIIID |
| F_6             | CAS-TypeIE   | CQ91      | CAS-TypeIIA  | YL_11     | CAS-TypeIE   |
| GD611           | CAS-TypeIE   | D12       | CAS-TypeIIA  | YZ96      | CAS-TypeIIC  |
| GD752           | CAS-TypeIE   | SL241     | CAS-TypeIE   | YZ96      | CAS-TypeIIA  |
| GD762           | CAS-TypeIE   | SL241     | CAS-TypeIIA  | BFE6620   | CAS-TypeIE   |
| NCC2970         | CAS-TypeIIA  | SL241     | CAS-TypeIIIA | HN239     | CAS-TypeIIA  |
| GS504           | CAS-TypeIIC  | AF16_22LB | CAS-TypeIIIA | 222       | CAS-TypeIIC  |
| GS504           | CAS-TypeIIA  | AF16_22LB | CAS-TypeIIA  | YN54      | CAS-TypeIIA  |
| QH221           | CAS-TypeIIA  | S30       | CAS-TypeIIA  | SL2213    | CAS-TypeIIA  |
| HN401           | CAS-TypeIIA  | L18       | CAS-TypeIIA  | GX51      | CAS-TypeIE   |
| HN401           | CAS-TypeIE   | HN286     | CAS-TypeIIA  | BJ211     | CAS-TypeIIA  |
| SL312           | CAS-TypeIE   | HN286     | CAS-TypeIIIA | DS13_7    | CAS-TypeIIC  |
| IFO3956         | CAS-TypeIE   | SH65      | CAS-TypeIE   | DS13_7    | CAS-TypeIE   |

## Foods

|          |              |           |              |            |              |
|----------|--------------|-----------|--------------|------------|--------------|
| IFO3956  | CAS-TypeIC   | SH65      | CAS-TypeIIIA | DS13_7     | CAS-TypeIIA  |
| NBRC3959 | CAS-TypeIE   | SH95      | CAS-TypeIE   | DS19_7     | CAS-TypeIIA  |
| NBRC3959 | CAS-TypeIC   | SH95      | CAS-TypeIIIA | DS19_7     | CAS-TypeIE   |
| NT753    | CAS-TypeIE   | ZJ122     | CAS-TypeIIA  | SRCM103290 | CAS-TypeIE   |
| NX657    | CAS-TypeIE   | ZJ122     | CAS-TypeIIIA | SRCM103290 | CAS-TypeIIA  |
| QH804    | CAS-TypeIE   | 2760      | CAS-TypeIIA  | IMDO130101 | CAS-TypeIIA  |
| XW241    | CAS-TypeIE   | 2760      | CAS-TypeIIIA | IMDO130101 | CAS-TypeIE   |
| WX161    | CAS-TypeIE   | 2760      | CAS-TypeIE   | FUA3588    | CAS-TypeIE   |
| XC416    | CAS-TypeIE   | 3872      | CAS-TypeIIA  | FUA3588    | CAS-TypeIIIA |
| XC61     | CAS-TypeIIA  | 3872      | CAS-TypeIC   | FUA3589    | CAS-TypeIE   |
| XC61     | CAS-TypeIC   | KMB_612   | CAS-TypeIIA  | FUA3589    | CAS-TypeIC   |
| XW331    | CAS-TypeIIIA | FTDC_8312 | CAS-TypeIIA  | 311        | CAS-TypeIC   |
| XW341    | CAS-TypeIIIA | FTDC_8312 | CAS-TypeIE   | 311        | CAS-TypeIIA  |
| NM271    | CAS-TypeIIA  | USM_8633  | CAS-TypeIIA  | GD331      | CAS-TypeIIA  |
| WX213    | CAS-TypeIE   | USM_8633  | CAS-TypeIE   | GD723      | CAS-TypeIIA  |
| WX61     | CAS-TypeIE   | VRI_003   | CAS-TypeIIA  | GD741      | CAS-TypeIIA  |
| AH471    | CAS-TypeIE   | VRI_003   | CAS-TypeIE   | SL521      | CAS-TypeIE   |
| BJ631    | CAS-TypeIE   | FAM19471  | CAS-TypeIIA  | SP241      | CAS-TypeIE   |
| HM107    | CAS-TypeIE   | FAM19471  | CAS-TypeIE   | ZT139      | CAS-TypeIE   |
| BJ581    | CAS-TypeIE   | YN361     | CAS-TypeIE   | HM311      | CAS-TypeIIA  |
| SH272    | CAS-TypeIE   | YN361     | CAS-TypeIIC  | HM311      | CAS-TypeIE   |
| CQ61     | CAS-TypeIE   | YN361     | CAS-TypeIIA  | HM321      | CAS-TypeIE   |
| NT41     | CAS-TypeIE   | YN361     | CAS-TypeIC   | WX11       | CAS-TypeIE   |
| 39       | CAS-TypeIE   | CECT9269  | CAS-TypeIE   | WX114      | CAS-TypeIIA  |
| NT575    | CAS-TypeIE   | CECT9269  | CAS-TypeIIA  | WX114      | CAS-TypeIE   |
| BJ204    | CAS-TypeIE   | CECT9269  | CAS-TypeIIIA | WX113      | CAS-TypeIIA  |
| NX642    | CAS-TypeIE   | CRL1446   | CAS-TypeIIA  | WX113      | CAS-TypeIE   |
| XW391    | CAS-TypeIE   | CRL1446   | CAS-TypeIE   | WX112      | CAS-TypeIIA  |
| XW391    | CAS-TypeIE   | CRL1446   | CAS-TypeIIIA | WX112      | CAS-TypeIE   |
| YC74     | CAS-TypeIE   | LF2       | CAS-TypeIIA  | WX115      | CAS-TypeIIA  |
| YC74     | CAS-TypeIIC  | LF2       | CAS-TypeIIIA | WX115      | CAS-TypeIE   |
| YC74     | CAS-TypeIIA  | ATCC14931 | CAS-TypeIIA  | WX111      | CAS-TypeIE   |
| FJ16     | CAS-TypeIE   | B128      | CAS-TypeIIA  | WX111      | CAS-TypeIIA  |
| SD131    | CAS-TypeIE   | HFD1      | CAS-TypeIIA  | YZ156      | CAS-TypeIIA  |
| FJ181    | CAS-TypeIE   | KMB_613   | CAS-TypeIIA  | YZ156      | CAS-TypeIE   |
| CQ309    | CAS-TypeIE   | YN96      | CAS-TypeIIA  | NT153      | CAS-TypeIE   |
| XS212    | CAS-TypeIE   | CECT5716  | CAS-TypeIE   | WX121      | CAS-TypeIE   |
| XW411    | CAS-TypeIE   | CECT5716  | CAS-TypeIC   | RI_508     | CAS-TypeIE   |
| ZT591    | CAS-TypeIE   | DR9       | CAS-TypeIIA  | WX141      | CAS-TypeIE   |
| ZT25     | CAS-TypeIC   | DR9       | CAS-TypeIE   | SL1321     | CAS-TypeIE   |
| ZT251    | CAS-TypeIE   | DR9       | CAS-TypeIIIA | Lf1        | CAS-TypeIC   |

Foods

|       |             |         |              |       |             |
|-------|-------------|---------|--------------|-------|-------------|
| CQ71  | CAS-TypeIIA | LMT2_75 | CAS-TypeIE   | LfU21 | CAS-TypeIIA |
| GD181 | CAS-TypeIIA | LMT2_75 | CAS-TypeIIIA |       |             |

Figure S1: Phylogenetic analysis of cas1 and cas2 genes in the genome of *L. fermentum* from human gut and food.

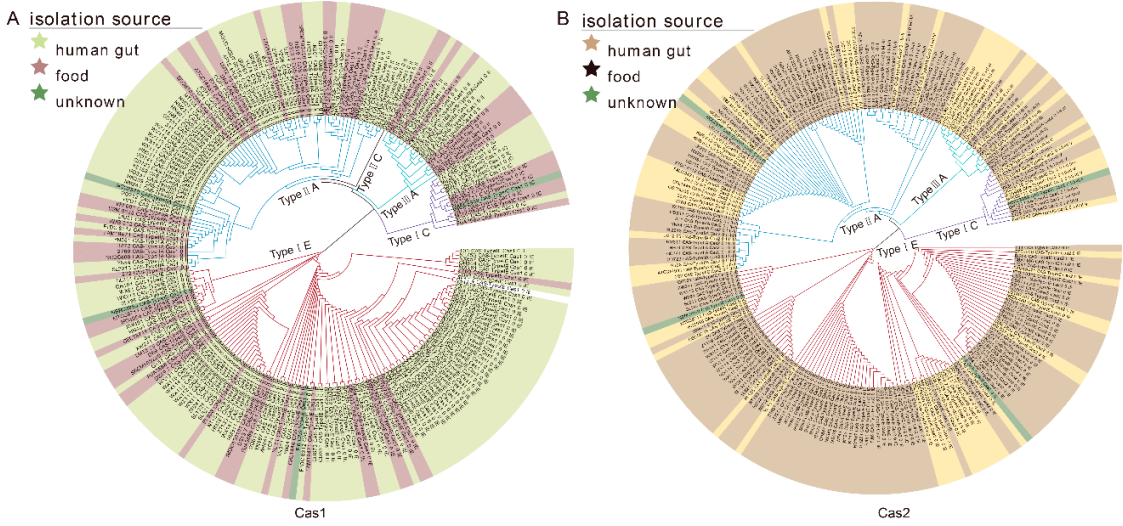

Supplement: s1 [file s1]
